# Supplementary material
Source: publisher site journal article supplement (https://bdj.pensoft.net/article/download/suppl/6747043/)
Supplement: Supplementary file

# Distance Summary Result

## DS-AFROPRIO (70 sequences)

### Distance Summary Tables

The distribution of sequence divergence at each taxonomic level is summarized below. Detailed distance tables can be downloaded by clicking on Details button for each rank.

| Label          | n  | Taxa | Comparisons | Min Dist(%) | Mean Dist(%) | Max Dist(%) | SE Dist(%) |
|----------------|----|------|-------------|-------------|--------------|-------------|------------|
| Within Species | 42 | 9    | 234         | 0.00        | 2.02         | 14.34       | 0.01       |
| Within Genus   | 31 | 3    | 52          | 14.57       | 19.82        | 21.19       | 0.03       |
| Within Family  | 53 | 1    | 1092        | 16.68       | 26.41        | 32.35       | 0.00       |

### Distance Summary Graphs

Sequence divergence for all sequences compared at the species and genus levels.

#### Within Species

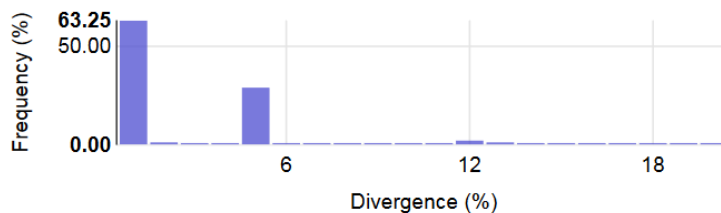

#### Within Genus

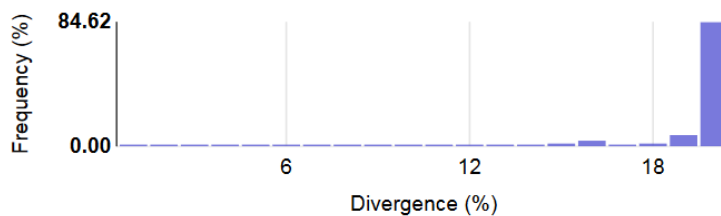

---

## Normalized Results

The within-species distribution is normalized to reduce bias in sampling at the species level. The table below summarizes this distribution, while the histogram plots the distribution of normalized divergence for species (blue) against the genus divergences (red).

### Normalized Divergence Statistics

| Quantity                           | Value |
|------------------------------------|-------|
| Species Count                      | 9     |
| Mean Within-Species Dist (%)       | 2.83  |
| SE of Mean Within-Species Dist (%) | 0.45  |
| Min Between-species Dist (%)       | 14.57 |

### Normalized Divergence Histogram

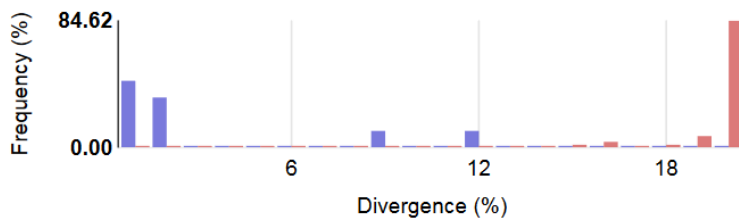

### Analysis description

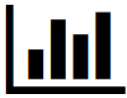

The Distance Summary reports the sequence divergence between barcode sequences at the species, genus and family level, and also contrasts the distribution of within-species divergence to between-species divergence.

**Distance Model:** Kimura 2 Parameter

**Marker:** COI-5P

**Deletion Method:** Pairwise Deletion

**Minimum Complete Columns:** 0

**Group By:** Geography: GPS

**Alignment:** BOLD Aligner (Amino Acid based HMM)

**Filters Applied:**  $\geq 200$ bp only
